# Supplementary material for: Assessment of the Aging of the Brown Adipose Tissue by 1 8 F-FDG PET/CT Imaging in the Progeria Mouse Model Lmna −/−
Source: Hindawi journal article supplement (doi:10.1155/2018/8327089), 2018-07-11
Supplement: f1 [file 8327089.f1.pdf]

## **SUPPLEMENTARY MATERIAL**

Assessment of the aging of the brown adipose tissue by  $^{18}\text{F}$ -FDG PET/CT imaging in the progeria mouse model *Lmna*<sup>-/-</sup>

Zhengjie Wang<sup>1, #</sup>, Xiaolong Xu<sup>2, #</sup>, Yi Liu<sup>1, #</sup>, Yongheng Gao<sup>1</sup>, Fei Kang<sup>1, \*</sup>, Baohua Liu<sup>3,4,5 \*</sup>, Jing Wang<sup>1, \*</sup>

### **Materials and Methods**

The primers of the Lamin A were synthesized from the Takara. Forward primer: CTATTGCATGCTTCTCCTCAG; Reverse primer: TGAGCGCAGGTTGTACTCAG. The PCR conditions to amplify the Lamin A were set as follows: pre-heating for 5 minutes at 95°C, and 40 cycles of denaturation (30 seconds at 95°C), annealing (60 seconds at 59°C) and elongation (30 seconds at 72°C), and 5 minutes at 72°C. The Lamin A/C antibody was purchased from the Abcam(EPR4068).

## FIGURE LEGENDS

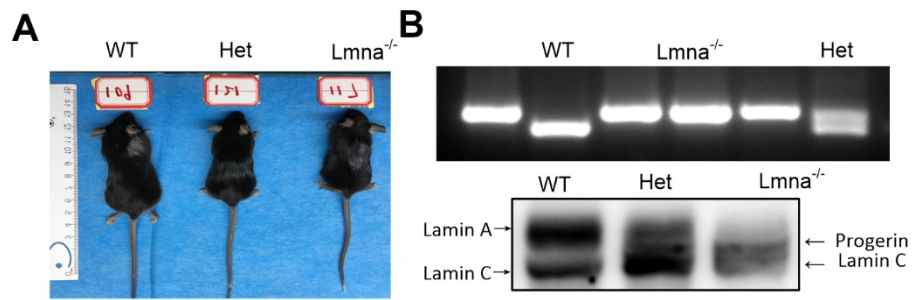

**Supplementary figure 1.** Identification of  $Lmna^{-/-}$  mice. (A) The photograph of the three kinds of mice at 14 weeks age. Het, Heterozygote; (B)  $Lmna^{-/-}$  mice were identified by PCR and western blot. Progerin, the truncated type of Lamin A.

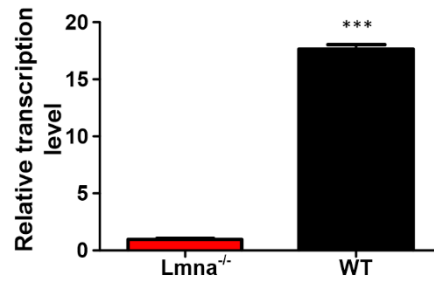

**Supplementary figure 2.** Relative transcription levels of GLUT1 in the BAT of *Lmna*<sup>-/-</sup> and WT mice. \*\*\*  $P < 0.001$ .
